# Supplementary material
Source: PubMed Central journal article supplement (PMC4656778)
Supplement: ajtr0007-2015-f5.pdf [file ajtr0007-2015-f5.pdf]

## Prognostic role of HMGB1 for gallbladder cancer

**Table S1.** The association of HMGB1 expression with various clinicopathological characteristics of patients with AC gallbladder cancer

| Clinicopathological characteristics | Total NO. | HMGB1            |                | P value |
|-------------------------------------|-----------|------------------|----------------|---------|
|                                     |           | Positive No. (%) | $\chi^2$ value |         |
| Gender                              |           |                  |                |         |
| Male                                | 33        | 15 (45.5)        | 0.244          | 0.621   |
| Female                              | 47        | 24 (51.1)        |                |         |
| Age (Year)                          |           |                  |                |         |
| ≤45                                 | 18        | 8 (44.4)         | 0.172          | 0.678   |
| >45                                 | 62        | 31 (50.0)        |                |         |
| Differentiation grade               |           |                  |                |         |
| Well-differentiated                 | 30        | 11 (36.7)        | 0.858          | 0.651   |
| Moderately-differentiated           | 27        | 13 (48.1)        |                |         |
| Poorly-differentiated               | 23        | 15 (65.2)        |                |         |
| Maximal tumor diameter (cm)         |           |                  |                |         |
| ≤3                                  | 49        | 19 (38.8)        | 5.035          | 0.025   |
| >3                                  | 31        | 20 (64.5)        |                |         |
| Cholecystolithiasis                 |           |                  |                |         |
| No                                  | 36        | 17 (47.2)        | 0.061          | 0.805   |
| Yes                                 | 44        | 22 (50.0)        |                |         |
| TNM stage                           |           |                  |                |         |
| I+II                                | 29        | 11 (37.9)        | 2.439          | 0.295   |
| III                                 | 38        | 20 (52.6)        |                |         |
| IV                                  | 13        | 8 (61.5)         |                |         |
| Lymph node metastasis               |           |                  |                |         |
| No                                  | 34        | 15 (44.1)        | 0.508          | 0.476   |
| Yes                                 | 46        | 24 (52.2)        |                |         |
| Regional invasion                   |           |                  |                |         |
| No                                  | 35        | 16 (45.7)        | 0.230          | 0.632   |
| Yes                                 | 45        | 23 (51.1)        |                |         |
| Surgical method                     |           |                  |                |         |
| Radical                             | 31        | 13 (41.9)        | 2.782          | 0.256   |
| Palliative                          | 27        | 12 (44.4)        |                |         |
| Without resection                   | 22        | 14 (63.6)        |                |         |
| Her-2 expression                    |           |                  |                |         |
| Positive                            | 30        | 16 (53.3)        | 0.404          | 0.525   |
| Negative                            | 50        | 23 (46.0)        |                |         |
| ER expression                       |           |                  |                |         |
| Positive                            | 61        | 34 (55.7)        | 5.020          | 0.025   |
| Negative                            | 19        | 5 (26.3)         |                |         |
| PR expression                       |           |                  |                |         |
| Positive                            | 59        | 29 (49.2)        | 0.015          | 0.904   |
| Negative                            | 21        | 10 (47.6)        |                |         |
| P53 expression                      |           |                  |                |         |
| Positive                            | 64        | 32 (50.0)        | 0.200          | 0.655   |
| Negative                            | 16        | 7 (43.8)         |                |         |
| Ki-67 expression                    |           |                  |                |         |
| Positive                            | 65        | 35 (53.8)        | 3.604          | 0.058   |
| Negative                            | 15        | 4 (26.7)         |                |         |
| Nm23 expression                     |           |                  |                |         |
| Positive                            | 16        | 4 (31.3)         | 4.515          | 0.034   |
| Negative                            | 64        | 35 (53.1)        |                |         |

## Prognostic role of HMGB1 for gallbladder cancer

**Table S2.** The association of HMGB1 expression with various clinicopathological characteristics of patients with SC/ASC gallbladder cancer

| Clinicopathological characteristics | Total NO. | HMGB1            |                | P value |
|-------------------------------------|-----------|------------------|----------------|---------|
|                                     |           | Positive No. (%) | $\chi^2$ value |         |
| Gender                              |           |                  |                |         |
| Male                                | 20        | 11 (55.0)        | 0.288          | 0.592   |
| Female                              | 32        | 20 (62.5)        |                |         |
| Age (Year)                          |           |                  |                |         |
| ≤45                                 | 11        | 6 (54.5)         | 0.146          | 0.702   |
| >45                                 | 41        | 25 (63.4)        |                |         |
| Differentiation grade               |           |                  |                |         |
| Well-differentiated                 | 19        | 8 (42.1)         | 7.102          | 0.029   |
| Moderately-differentiated           | 18        | 10 (55.6)        |                |         |
| Poorly-differentiated               | 15        | 13 (86.7)        |                |         |
| Maximal tumor diameter (cm)         |           |                  |                |         |
| ≤3                                  | 32        | 15 (46.9)        | 5.609          | 0.018   |
| >3                                  | 20        | 16 (80.0)        |                |         |
| Cholecystolithiasis                 |           |                  |                |         |
| No                                  | 24        | 14 (58.3)        | 0.030          | 0.862   |
| Yes                                 | 28        | 17 (60.7)        |                |         |
| TNM stage                           |           |                  |                |         |
| I+II                                | 15        | 6 (40.0)         | 3.661          | 0.056   |
| III                                 | 28        | 18 (64.3)        |                |         |
| IV                                  | 9         | 7 (77.8)         |                |         |
| Lymph node metastasis               |           |                  |                |         |
| No                                  | 21        | 9 (42.9)         | 4.109          | 0.043   |
| Yes                                 | 31        | 22 (71.0)        |                |         |
| Regional invasion                   |           |                  |                |         |
| No                                  | 22        | 11 (50.0)        | 1.464          | 0.226   |
| Yes                                 | 30        | 20 (66.7)        |                |         |
| Surgical method                     |           |                  |                |         |
| Radical                             | 19        | 8 (42.1)         | 5.025          | 0.081   |
| Palliative                          | 18        | 11 (61.1)        |                |         |
| Without resection                   | 15        | 12 (80.0)        |                |         |
| Her-2 expression                    |           |                  |                |         |
| Positive                            | 21        | 13 (61.9)        | 0.077          | 0.782   |
| Negative                            | 31        | 18 (58.1)        |                |         |
| ER expression                       |           |                  |                |         |
| Positive                            | 40        | 27 (67.5)        | 4.390          | 0.036   |
| Negative                            | 12        | 4 (33.3)         |                |         |
| PR expression                       |           |                  |                |         |
| Positive                            | 38        | 23 (60.5)        | 0.049          | 0.825   |
| Negative                            | 14        | 8 (57.1)         |                |         |
| P53 expression                      |           |                  |                |         |
| Positive                            | 42        | 25 (59.2)        | 0.001          | 0.978   |
| Negative                            | 10        | 6 (60.0)         |                |         |
| Ki-67 expression                    |           |                  |                |         |
| Positive                            | 43        | 29 (67.4)        | 6.199          | 0.013   |
| Negative                            | 9         | 2 (22.2)         |                |         |
| Nm23 expression                     |           |                  |                |         |
| Positive                            | 10        | 3 (30.0)         | 4.424          | 0.035   |
| Negative                            | 42        | 28 (66.7)        |                |         |

## Prognostic role of HMGB1 for gallbladder cancer

**Table S3.** Univariate analysis of survival for 80 patients with AC gallbladder cancer

| Characteristics        | Category | No. | Average survival time (Month) | 95% CI (Month) | P value |
|------------------------|----------|-----|-------------------------------|----------------|---------|
| HMGB1 expression       | Positive | 39  | 9.5                           | 6.3-12.7       | <0.05   |
|                        | Negative | 41  | 20.1                          | 13.9-26.3      |         |
| Maximal tumor diameter | ≤3 cm    | 49  | 25.6                          | 15.3-35.9      | <0.05   |
|                        | >3 cm    | 31  | 12.0                          | 8.5-15.5       |         |
| TNM stage              | I+II     | 29  | 30.6                          | 23.2-38.0      | <0.05   |
|                        | III      | 38  | 11.1                          | 7.3-14.9       |         |
|                        | IV       | 13  | 7.6                           | 5.4-9.80       |         |
| Lymph node metastasis  | No       | 34  | 18.1                          | 12.6-23.6      | <0.05   |
|                        | Yes      | 46  | 9.7                           | 5.5-13.9       |         |
| ER expression          | Positive | 61  | 17.5                          | 12.0-23.0      | <0.05   |
|                        | Negative | 19  | 10.5                          | 6.2-14.8       |         |
| Ki-67 expression       | Positive | 65  | 10.3                          | 6.1-14.5       | <0.05   |
|                        | Negative | 15  | 17.9                          | 12.1-23.7      |         |
| Nm23 expression        | Positive | 16  | 18.1                          | 12.6-23.6      | <0.05   |
|                        | Negative | 64  | 9.7                           | 5.6-13.8       |         |

**Table S4.** Multivariate Cox regression analysis of survival for 80 patients with AC gallbladder cancer

| Characteristics        | Category | Hazard ratio (HR) | 95% CI    | P value |
|------------------------|----------|-------------------|-----------|---------|
| HMGB1 expression       | Positive | 3.05              | 1.10-8.47 | <0.05   |
|                        | Negative |                   |           |         |
| Maximal tumor diameter | ≤3 cm    | 1.58              | 0.84-3.20 | <0.05   |
|                        | >3 cm    |                   |           |         |
| TNM stage              | I+II     | 1.77              | 1.01-3.03 | <0.05   |
|                        | III      |                   |           |         |
|                        | IV       |                   |           |         |
| Lymph node metastasis  | No       | 3.31              | 1.41-7.73 | <0.05   |
|                        | Yes      |                   |           |         |
| Ki-67 expression       | Positive | 2.43              | 1.25-4.73 | <0.05   |
|                        | Negative |                   |           |         |
| Nm23 expression        | Positive | 2.86              | 1.14-6.36 | <0.05   |
|                        | Negative |                   |           |         |

## Prognostic role of HMGB1 for gallbladder cancer

**Table S5.** Univariate analysis of survival for 52 patients with SC/ASC gallbladder cancer

| Characteristics         | Category                  | No. | Average survival time (Month) | 95% CI (Month) | P value |
|-------------------------|---------------------------|-----|-------------------------------|----------------|---------|
| HMGB1 expression        | Positive                  | 31  | 10.4                          | 7.2-13.6       | <0.05   |
|                         | Negative                  | 21  | 21.5                          | 14.4-28.6      |         |
| Maximal tumor diameter  | ≤3 cm                     | 32  | 24.4                          | 14.1-34.7      | <0.05   |
|                         | >3 cm                     | 20  | 13.2                          | 8.9-17.5       |         |
| Differentiation degrade | Well-differentiated       | 19  | 29.5                          | 22.7-36.3      | <0.05   |
|                         | Moderately-differentiated | 18  | 11.4                          | 7.9-14.9       |         |
|                         | Poorly-differentiated     | 15  | 6.7                           | 4.3-9.1        |         |
| TNM stage               | I+II                      | 15  | 28.3                          | 20.1-36.5      | <0.05   |
|                         | III                       | 28  | 10.3                          | 6.7-13.9       |         |
|                         | IV                        | 9   | 7.4                           | 5.1-9.7        |         |
| Lymph node metastasis   | No                        | 21  | 17.0                          | 11.4-22.6      | <0.05   |
|                         | Yes                       | 31  | 9.1                           | 5.0-13.2       |         |
| Regional invasion       | No                        | 22  | 18.3                          | 12.7-23.9      | <0.05   |
|                         | Yes                       | 30  | 8.4                           | 4.3-12.5       |         |
| ER expression           | Positive                  | 40  | 17.3                          | 12.0-22.6      | <0.05   |
|                         | Negative                  | 12  | 12.3                          | 8.4-16.2       |         |
| Ki-67 expression        | Positive                  | 43  | 9.1                           | 5.2-13.0       | <0.05   |
|                         | Negative                  | 9   | 16.2                          | 11.4-21.0      |         |
| Nm23 expression         | Positive                  | 10  | 16.3                          | 10.3-22.3      | <0.05   |
|                         | Negative                  | 42  | 8.5                           | 4.3-12.7       |         |

**Table S6.** Multivariate Cox regression analysis of survival for 52 patients with SC/ASC gallbladder cancer

| Characteristics         | Category                  | Hazard ratio (HR) | 95% CI    | P value |
|-------------------------|---------------------------|-------------------|-----------|---------|
| HMGB1 expression        | Positive                  | 3.09              | 1.19-8.06 | <0.05   |
|                         | Negative                  |                   |           |         |
| Differentiation degrade | Well-differentiated       | 3.20              | 1.08-9.83 | <0.05   |
|                         | Moderately-differentiated |                   |           |         |
|                         | Poorly-differentiated     |                   |           |         |
| Maximal tumor diameter  | ≤3 cm                     | 1.76              | 0.75-4.11 | <0.05   |
|                         | >3 cm                     |                   |           |         |
| TNM stage               | I+II                      | 1.65              | 0.65-1.65 | <0.05   |
|                         | III                       |                   |           |         |
|                         | IV                        |                   |           |         |
| Lymph node metastasis   | No                        | 3.25              | 1.37-7.72 | <0.05   |
|                         | Yes                       |                   |           |         |
| Ki-67 expression        | Positive                  | 2.30              | 1.12-4.74 | <0.05   |
|                         | Negative                  |                   |           |         |
| Nm23 expression         | Positive                  | 3.81              | 1.45-9.96 | <0.05   |
|                         | Negative                  |                   |           |         |
